# Supplementary material
Source: PubMed Central journal article supplement (PMC5360559)
Supplement: NIHMS849649-supplement-1.pdf [file NIHMS849649-supplement-1.pdf]

## Supplementary Figure 1

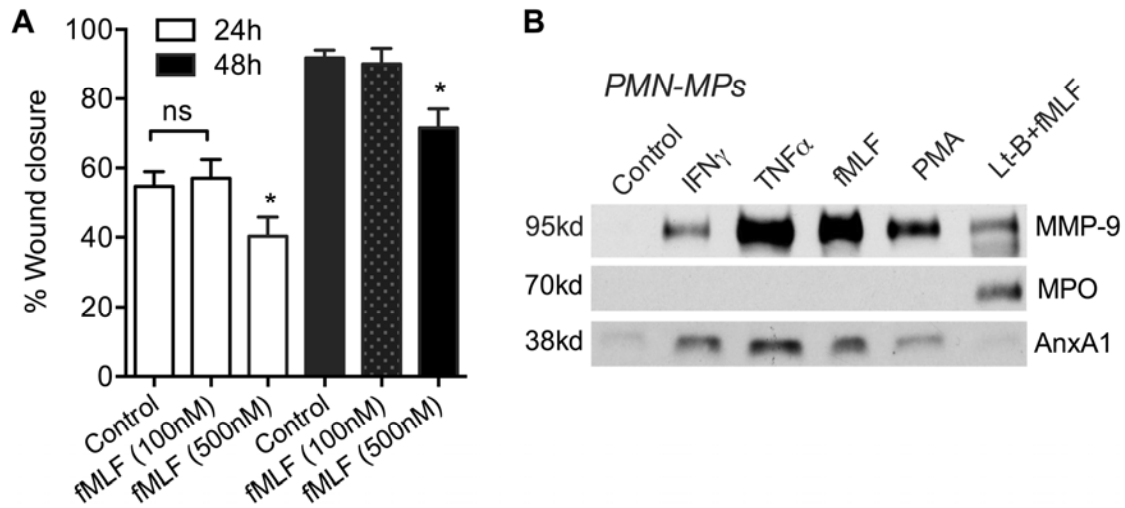

**Figure S1: IEC wound healing and PMN-MP protein content.** (A) Scratch wound assays using human IECs (Caco-2 BBe) were performed to examine the effect of high and low concentration of fMLF on wound healing. While 500nM fMLF treatment inhibited wound closure, lower concentration of fMLF (100nM) had no significant effect. (B) Expression of MMP-9, MPO and Annexin A1 on PMN-MPs derived from human PMNs under the indicated stimulation conditions ( $1 \times 10^6$  PMN/treatment) was examined by immunoblotting.
